# Supplementary material for: Determination of peroxodisulfate ion using composite film containing naphthol green B and multi-walled carbon nanotubes
Source: Royal Society of Chemistry journal article supplement (doi:10.1039/c1ay05222e), 2011-01-01
Supplement: c1ay05222e.pdf [file c1ay05222e.pdf]

## Supplementary materials

### Determination of peroxodisulfate ion using composite film containing naphthol green B and multi-walled carbon nanotubes

Yogeswaran Umasankar, Shih-Hong Wang, Shen-Ming Chen\*

Department of Chemical Engineering and Biotechnology, National Taipei University of Technology, No.1, Section 3, Chung-Hsiao East Road, Taipei 106, Taiwan (ROC).

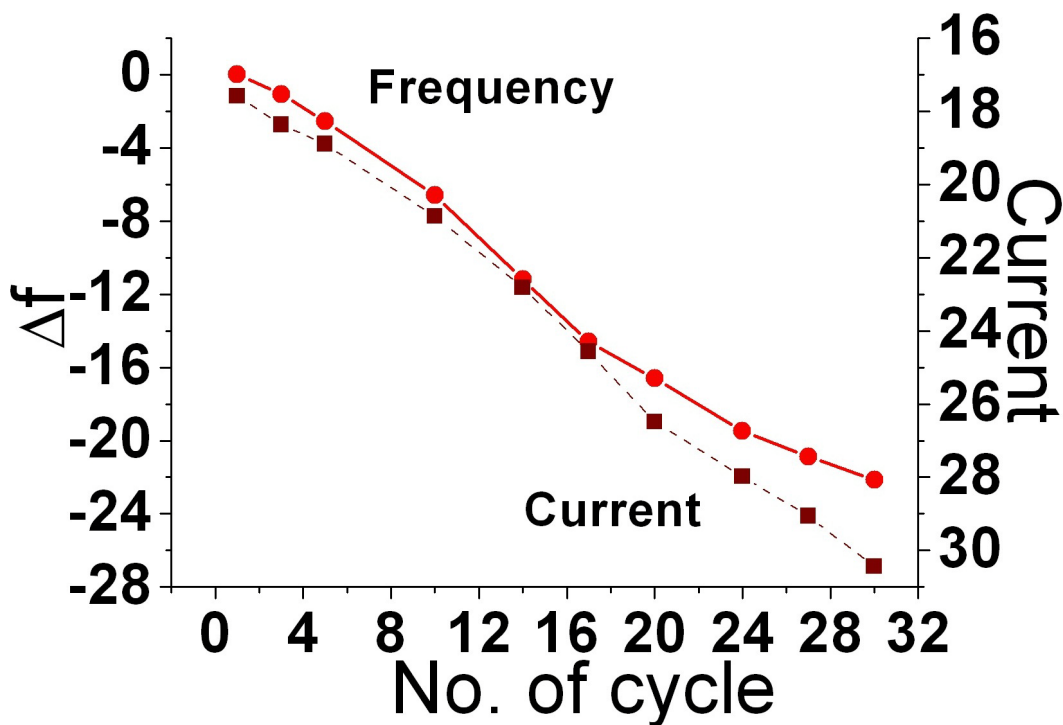

**Fig. S1.** Plot of variation of frequency change in Hz (continuous line) and peak current change in  $1 \times 10^{-7}$  A (dotted line) with the increase of scan cycles during the consecutive potential cyclic voltammograms of NGB at MWCNTs coated gold electrode (0.5 to -0.3 V with scan rate of  $50 \text{ mVs}^{-1}$ ).

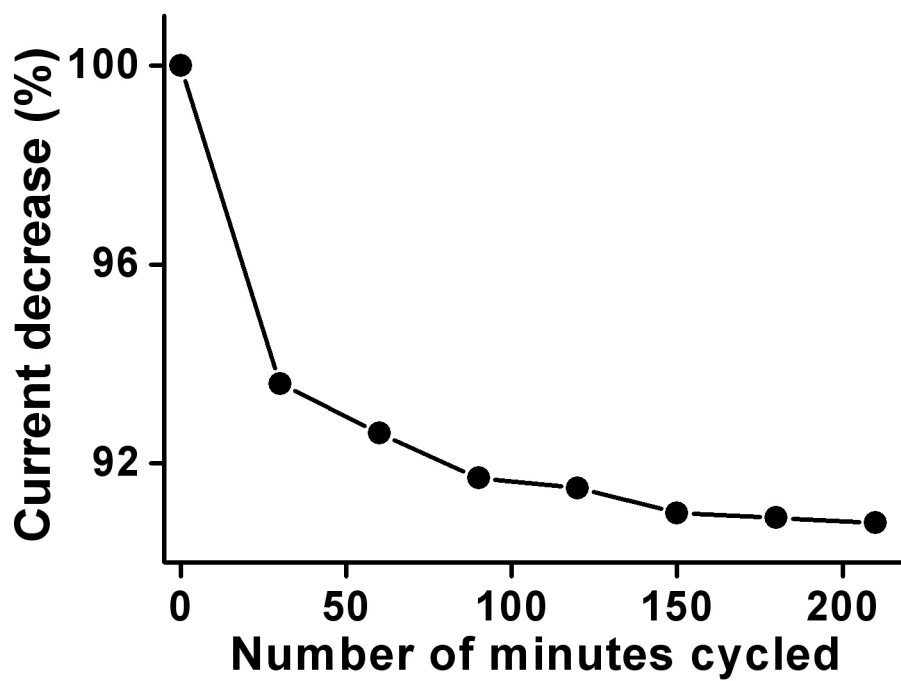

**Fig. S2.** Number of minutes cycled vs. current decrease in (%) for MWCNTs-NGB film.
